# Supplementary material for: Evaluation of the EMPAR study population on the basis of metabolic phenotypes of selected pharmacogenes
Source: PubMed Central journal article supplement (PMC8975744; doi:10.1038/s41397-022-00268-6), 2022-01-31
Supplement: 41397_2022_268_MOESM1_ESM.pdf [file 41397_2022_268_MOESM1_ESM.pdf]

## Supplementary material

**Table 1** Overview of investigated genes and genetic variants considered for the complete study population and the specific cardiovascular drug collectives. Genes marked in grey were only considered in quality control evaluations.

| Collective                                                                                               | Gene           | Marker        | Collective                | Gene          | Marker        |
|----------------------------------------------------------------------------------------------------------|----------------|---------------|---------------------------|---------------|---------------|
| Complete study population & Anticoagulant/antiplatelet collective                                        | <i>CYP2C19</i> | rs4244285     | Complete study population | <i>CYP2D6</i> | rs72549353    |
|                                                                                                          | <i>CYP2C19</i> | rs28399504    |                           | <i>CYP2D6</i> | rs5030865     |
|                                                                                                          | <i>CYP2C19</i> | rs56337013    |                           | <i>CYP2D6</i> | rs5030656     |
|                                                                                                          | <i>CYP2C19</i> | rs4986893     |                           | <i>CYP2D6</i> | rs28371706    |
|                                                                                                          | <i>CYP2C19</i> | rs72552267    |                           | <i>CYP2D6</i> | rs72549354    |
|                                                                                                          | <i>CYP2C19</i> | rs41291556    |                           | <i>CYP2D6</i> | rs1135840     |
|                                                                                                          | <i>CYP2C19</i> | rs72558186    |                           | <i>CYP2D6</i> | rs5030862     |
|                                                                                                          | <i>CYP2C19</i> | rs12248560    |                           | <i>CYP2D6</i> | rs16947       |
|                                                                                                          | <i>CYP2C9</i>  | rs7900194     |                           | <i>CYP2D6</i> | rs5030867     |
|                                                                                                          | <i>CYP2C9</i>  | rs72558187    |                           | <i>CYP2D6</i> | rs1065852     |
|                                                                                                          | <i>CYP2C9</i>  | rs1057910     |                           | <i>CYP2D6</i> | rs35742686    |
|                                                                                                          | <i>CYP2C9</i>  | rs9332239     |                           | <i>CYP2D6</i> | rs28371725    |
|                                                                                                          | <i>CYP2C9</i>  | rs9332131     |                           | <i>CYP2D6</i> | rs5030655     |
|                                                                                                          | <i>CYP2C9</i>  | rs72558190    |                           | <i>CYP2D6</i> | rs3892097     |
|                                                                                                          | <i>CYP2C9</i>  | rs28371685    |                           | <i>CYP2D6</i> | rs59421388    |
|                                                                                                          | <i>CYP2C9</i>  | rs56165452    |                           | <i>CYP2D6</i> | rs28371735    |
|                                                                                                          | <i>CYP2C9</i>  | rs28371686    |                           | <i>CYP2D6</i> | rs5030863     |
|                                                                                                          | <i>CYP2C9</i>  | rs72558188    |                           | <i>CYP2D6</i> | rs72549357    |
|                                                                                                          | <i>CYP2C9</i>  | rs1799853     |                           | <i>CYP2D6</i> | dup4125_4133  |
|                                                                                                          |                | <i>VKORC1</i> |                           | rs9923231     | <i>CYP1A2</i> |
| Complete study population & Anticoagulant/antiplatelet collective & Cholesterol lowering drug collective | <i>ABCB1</i>   | rs1045642     | <i>CYP1A2</i>             | rs56107638    |               |
|                                                                                                          |                |               |                           |               |               |
| Complete study population & Cholesterol lowering drug collective                                         | <i>SLCO1B1</i> | rs4149056     | <i>CYP1A2</i>             | rs12720461    |               |
|                                                                                                          | <i>CYP3A4</i>  | rs55785340    | <i>CYP1A2</i>             | rs2069514     |               |
|                                                                                                          | <i>CYP3A4</i>  | rs35599367    | <i>CYP1A2</i>             | rs72547513    |               |
|                                                                                                          | <i>CYP3A4</i>  | rs4987161     | <i>CYP2B6</i>             | rs28399499    |               |
|                                                                                                          | <i>CYP3A5</i>  | rs776746      | <i>CYP2B6</i>             | rs3745274     |               |
|                                                                                                          | <i>CYP3A5</i>  | rs28365083    |                           |               |               |
|                                                                                                          | <i>CYP3A5</i>  | rs41303343    |                           |               |               |
|                                                                                                          | <i>CYP3A5</i>  | rs10264272    |                           |               |               |

# Quality control plots of PGx Data (Agena Bioscience)

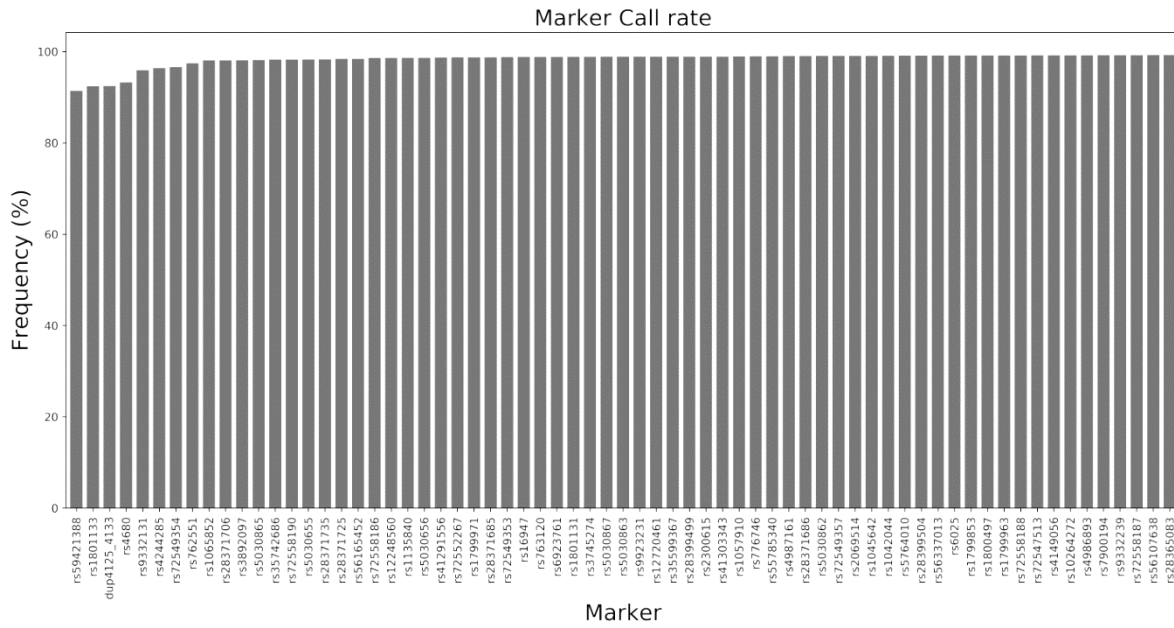

Figure 1 Marker call rates of all investigated markers (Agena Bioscience)

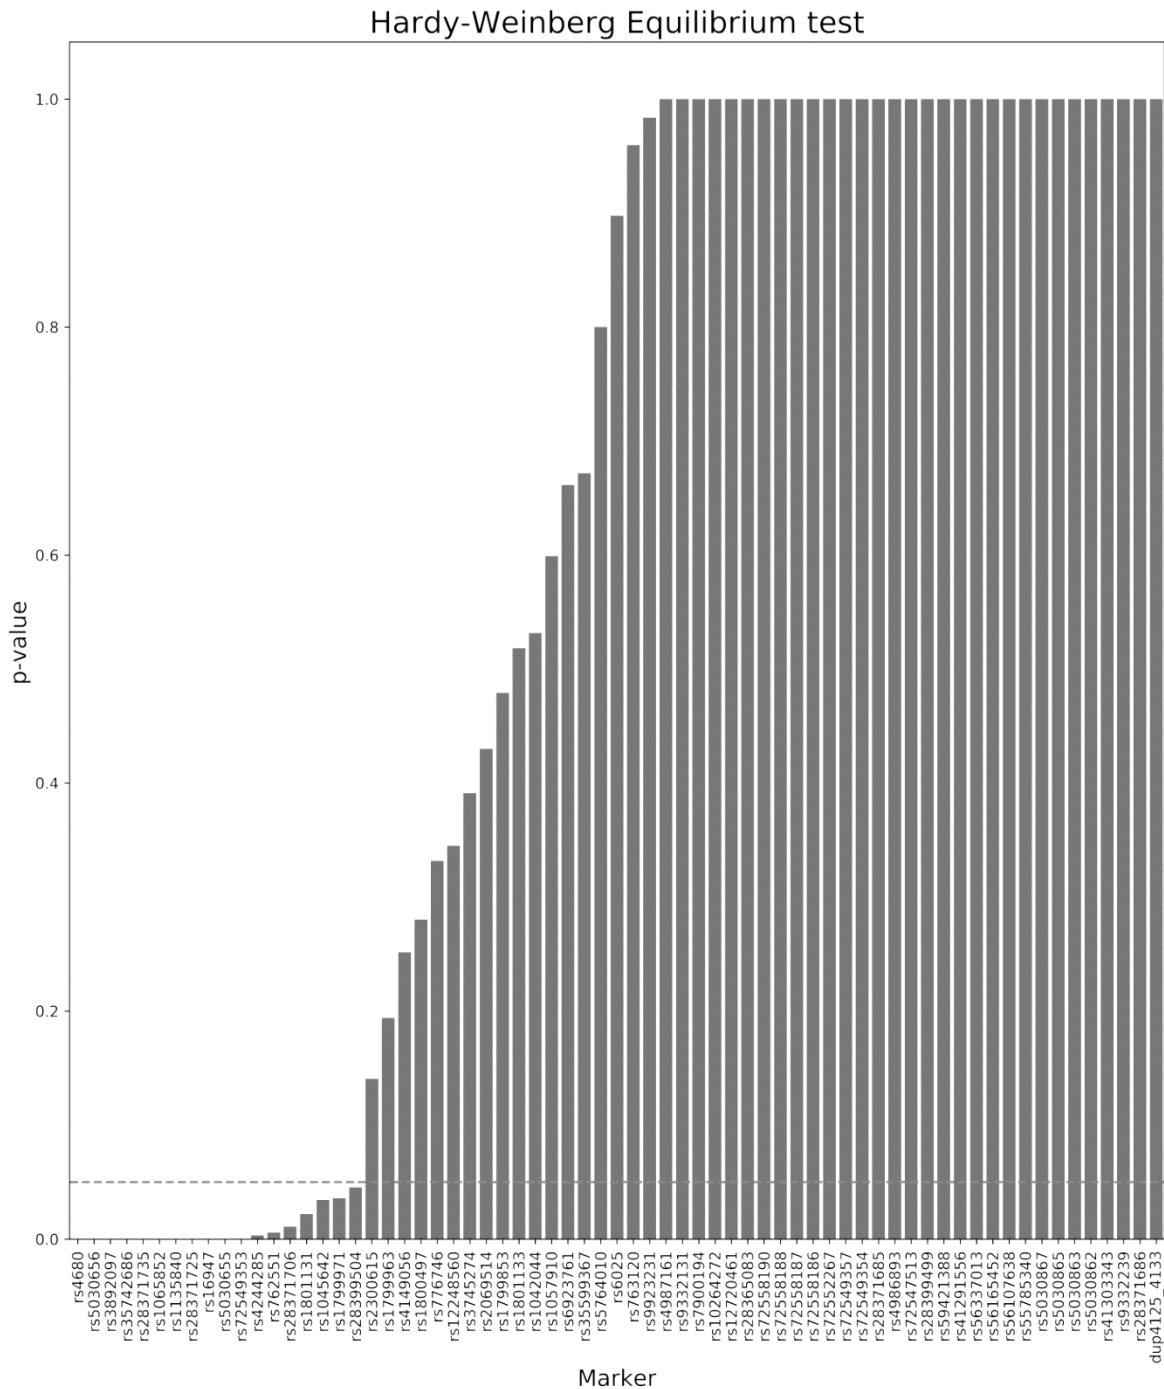

**Figure 2** Hardy Weinberg Equilibrium test results of all investigated markers. For *CYP2D6* 10 of 17 markers were observed to be not in equilibrium. Several variants of that fraction represent reduced function or non-functional alleles. Especially the markers rs5030656 (\*9) and rs5030655 (\*6) represent specific variants and were observed with low frequencies among Europeans (Whirl-Carrillo et al, 2012). Furthermore, two markers were observed for *CYP2C19* which are not in equilibrium as well. Among them, rs4244285 (\*2) encoding for poor functional- and rs28399504 (\*4) encoding for non-function activity. In addition, rs762551 (*CYP1A2*) was not accounted to be in HWE.

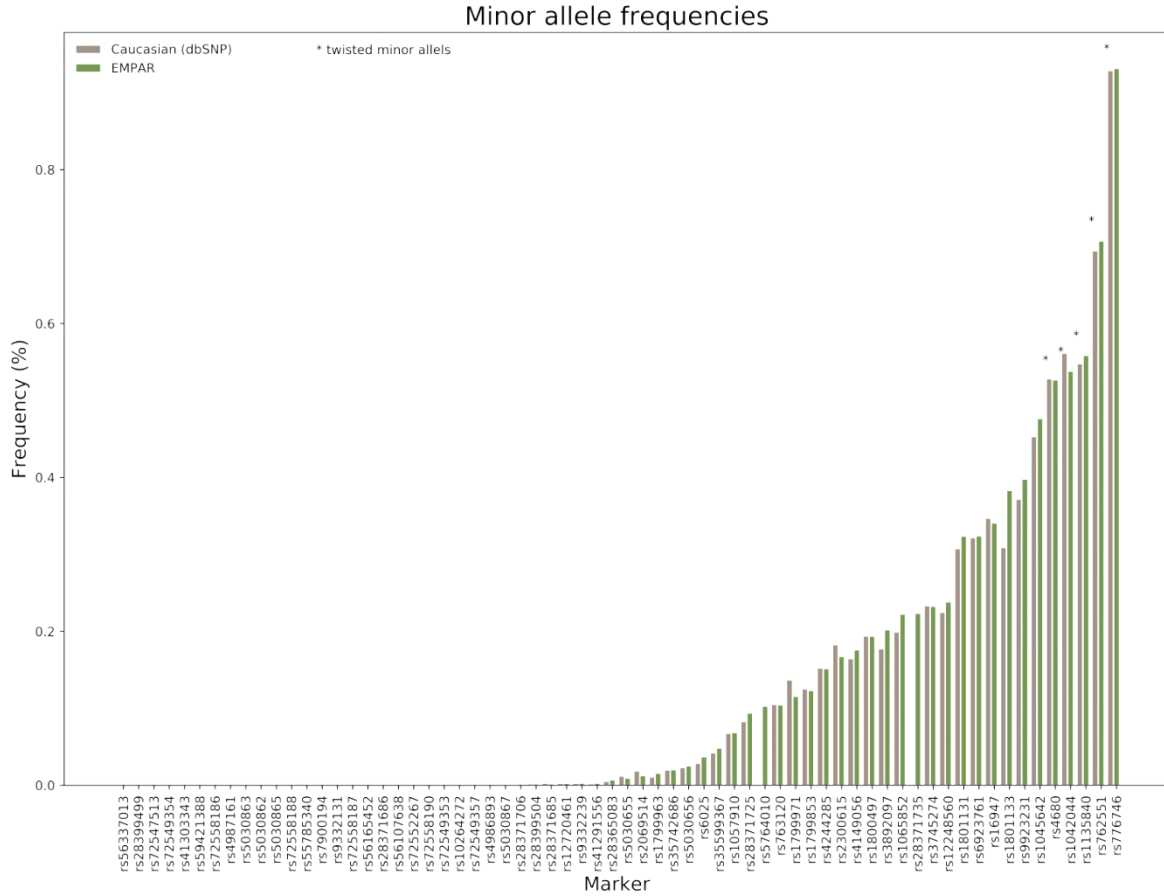

**Figure 3** Minor allele frequencies of all investigated markers compared to Caucasian dbSNP frequencies

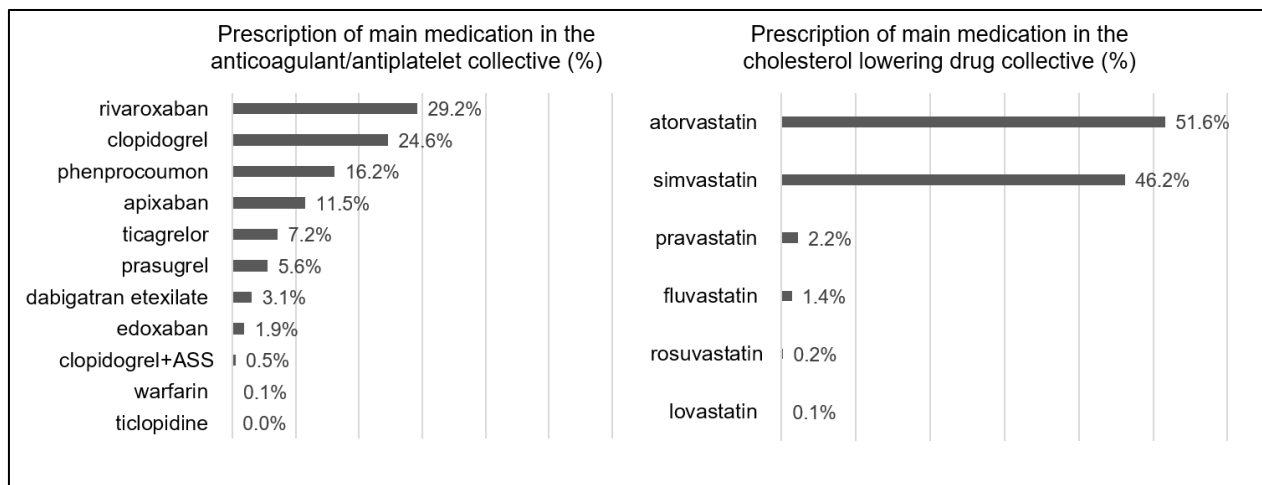

**Figure 4** Percentage of the most frequent prescriptions of main medication in the anticoagulant/antiplatelet and the cholesterol lowering drug collective. ASS: acetylsalicylic acid.

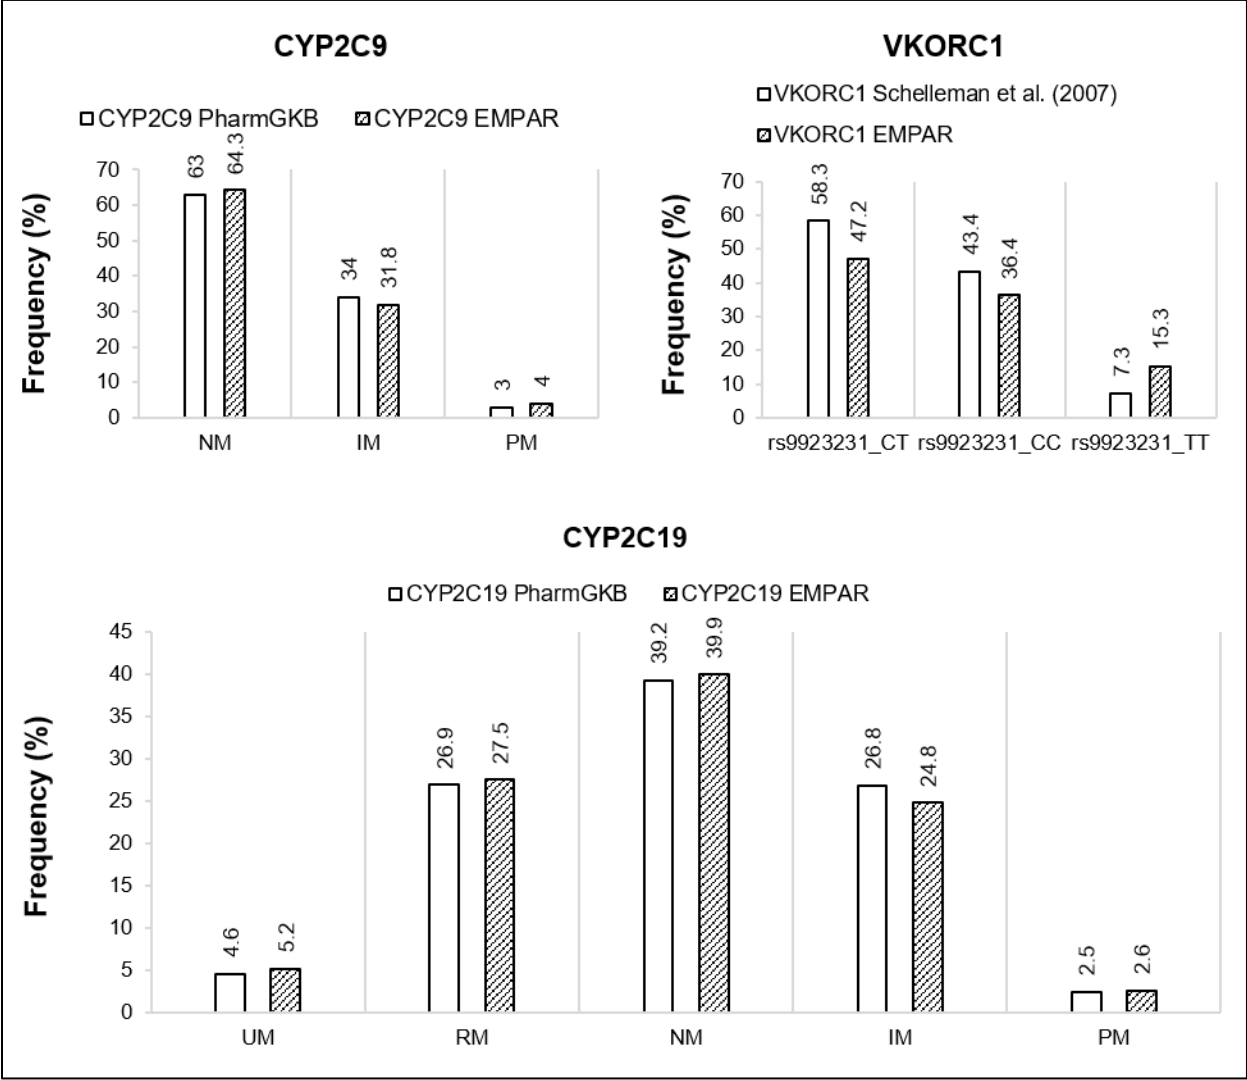

**Figure 5** Frequencies of computed metabolic profiles of genes involved in anticoagulant/antiplatelet metabolism (*CYP2C19*, *CYP2C9* and *VKORC1*) compared to reference data. UM: ultra-rapid metabolizer, RM: rapid metabolizer, NM: normal metabolizer, IM: intermediate metabolizer, PM: poor metabolizer

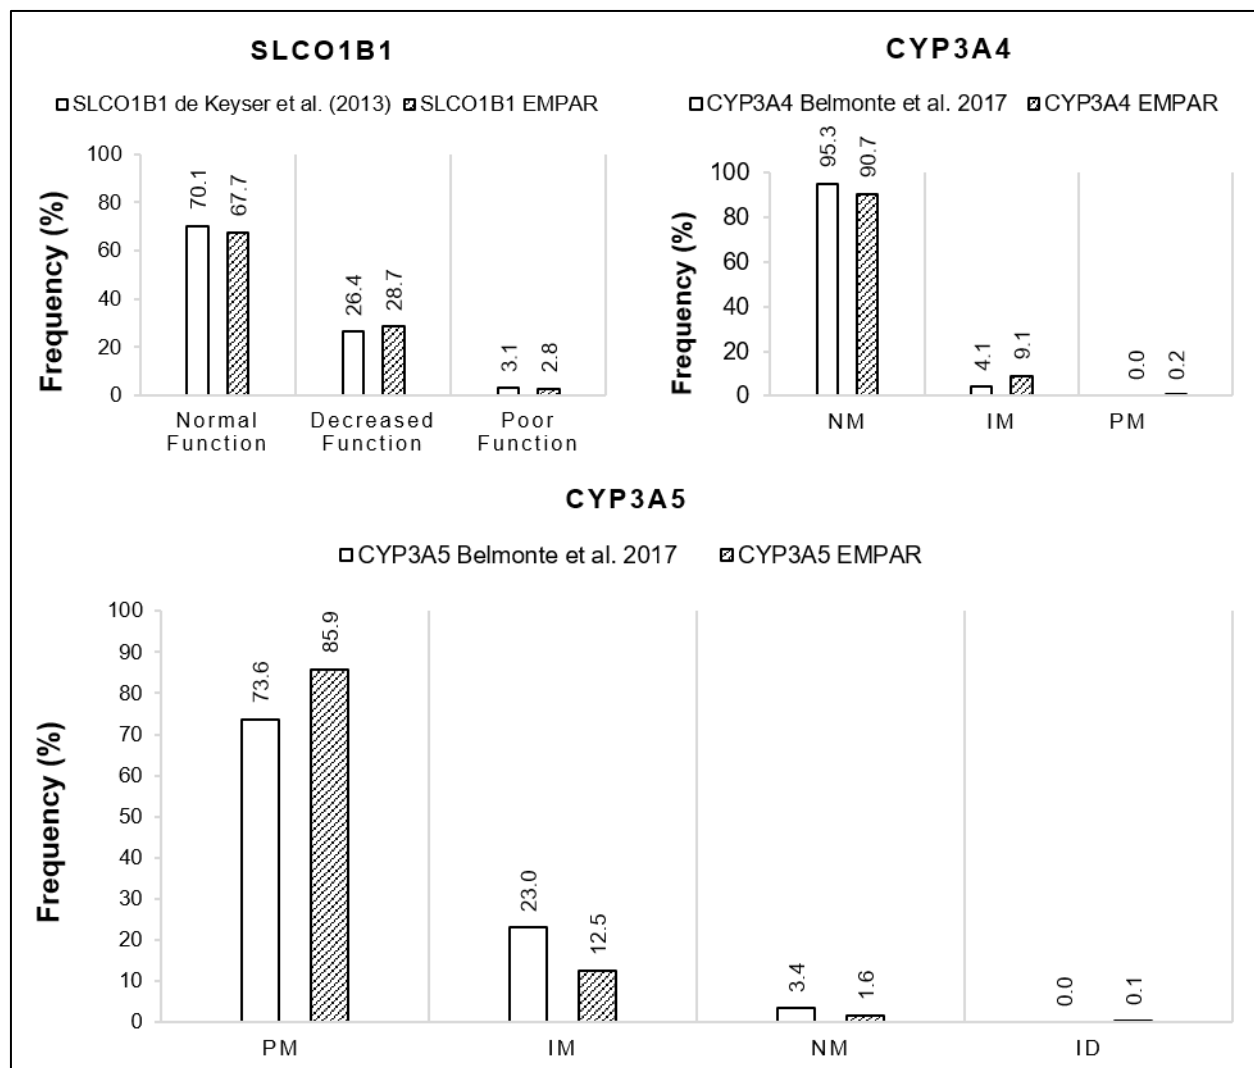

**Figure 6** Frequencies of computed metabolic profiles involved in statin metabolism or transport (*CYP3A4*, *CYP3A5* and *SLCO1B1*) compared to reference data. NM: normal metabolizer, IM: intermediate metabolizer, PM: poor metabolizer, ID: intermediate metabolizer

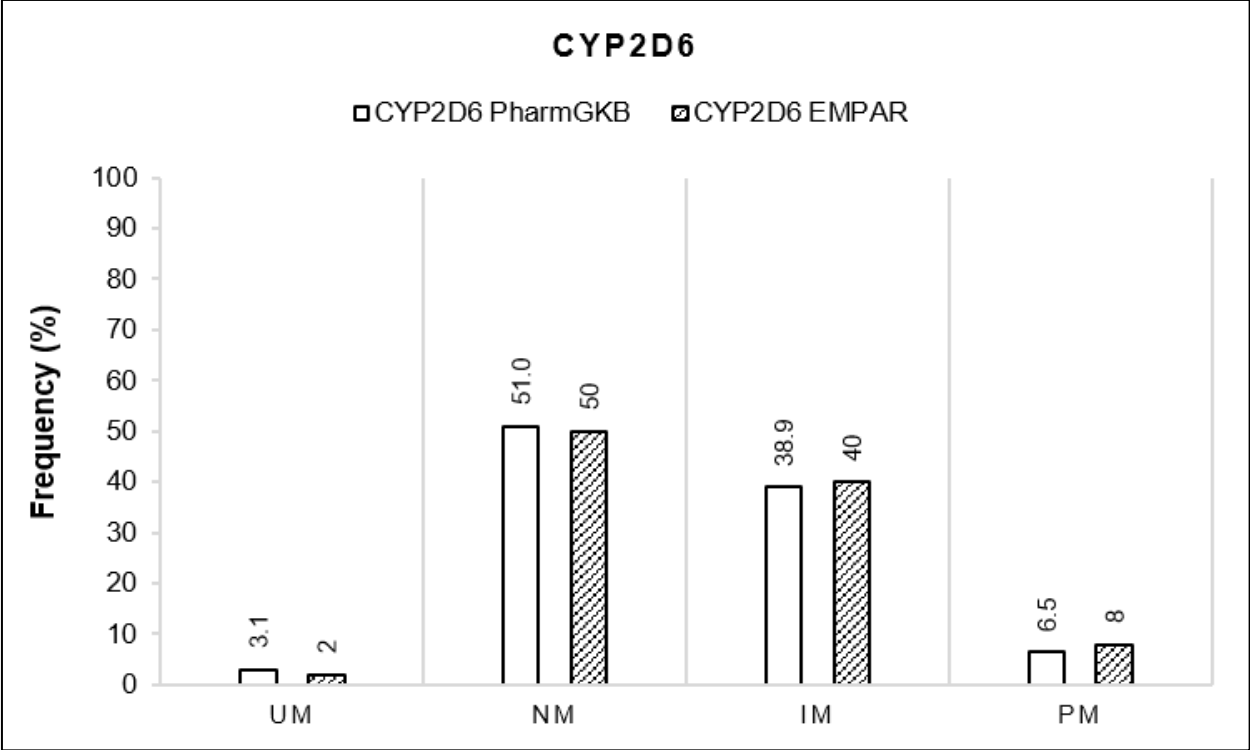

**Figure 7** Frequencies of computed metabolic profiles (*CYP2D6*) compared to reference data. UM: ultra-rapid metabolizer, NM: normal metabolizer, IM: intermediate metabolizer, PM: poor metabolizer. The VeriDose CYP2D6 CNV panel was applied to compute the ultra-rapid metabolizer status (UM) for *CYP2D6*. In addition, this panel reports the (*CYP2D6-CYP2D7*) hybrid allele information for Exon9, \*68 and \*13 variants. The overall phenotype computation was improved by this information.

# Diplotype-Diplotype combinations per collective

## Anticoagulant/antiplatelet collective

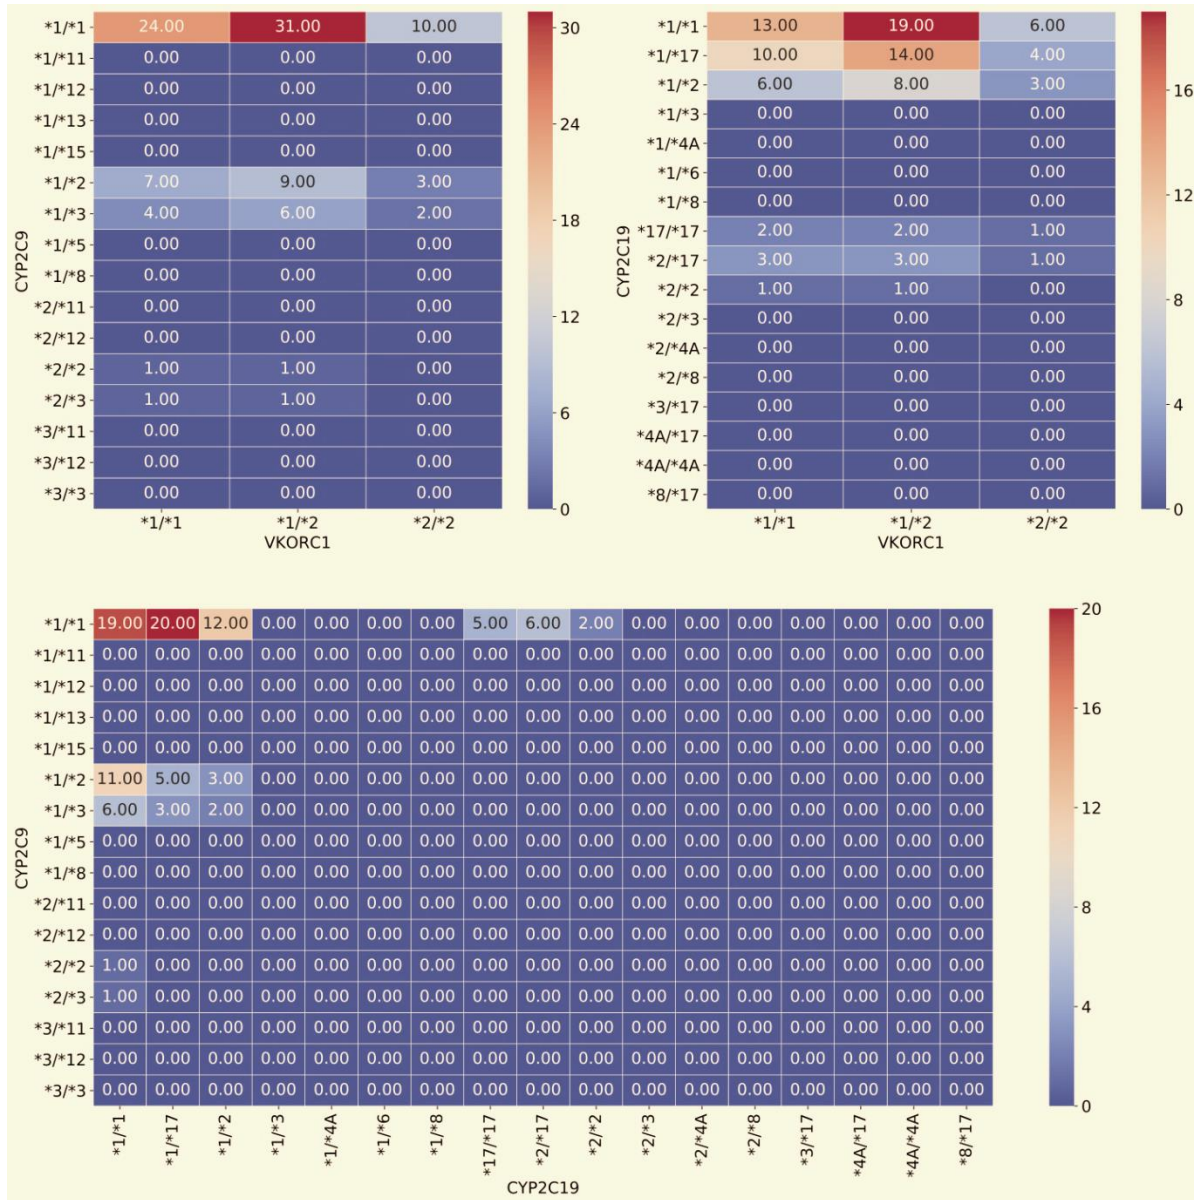

**Figure 8** Frequencies (%) of Diplotype-Diplotype combinations of *CYP2C9*, *CYP2C19* and *VKORC1*. Highest frequencies are represented by *CYP2C9*\*1/\*1 with *CYP2C19*\*1/\*17 and *CYP2C9*\*1/\*1 with *CYP2C19*\*1/\*1. For *VKORC1*, the most frequent combination was \*1/\*1 and \*1/\*2 (*CYP2C9*(1)9 and *VKORC1*). The highest haplotype deviations from the normal function were \*2 for *CYP2C9/VKORC1* (decreased function) and \*17 (increased function) for *CYP2C19* with potential effect on drug therapy.



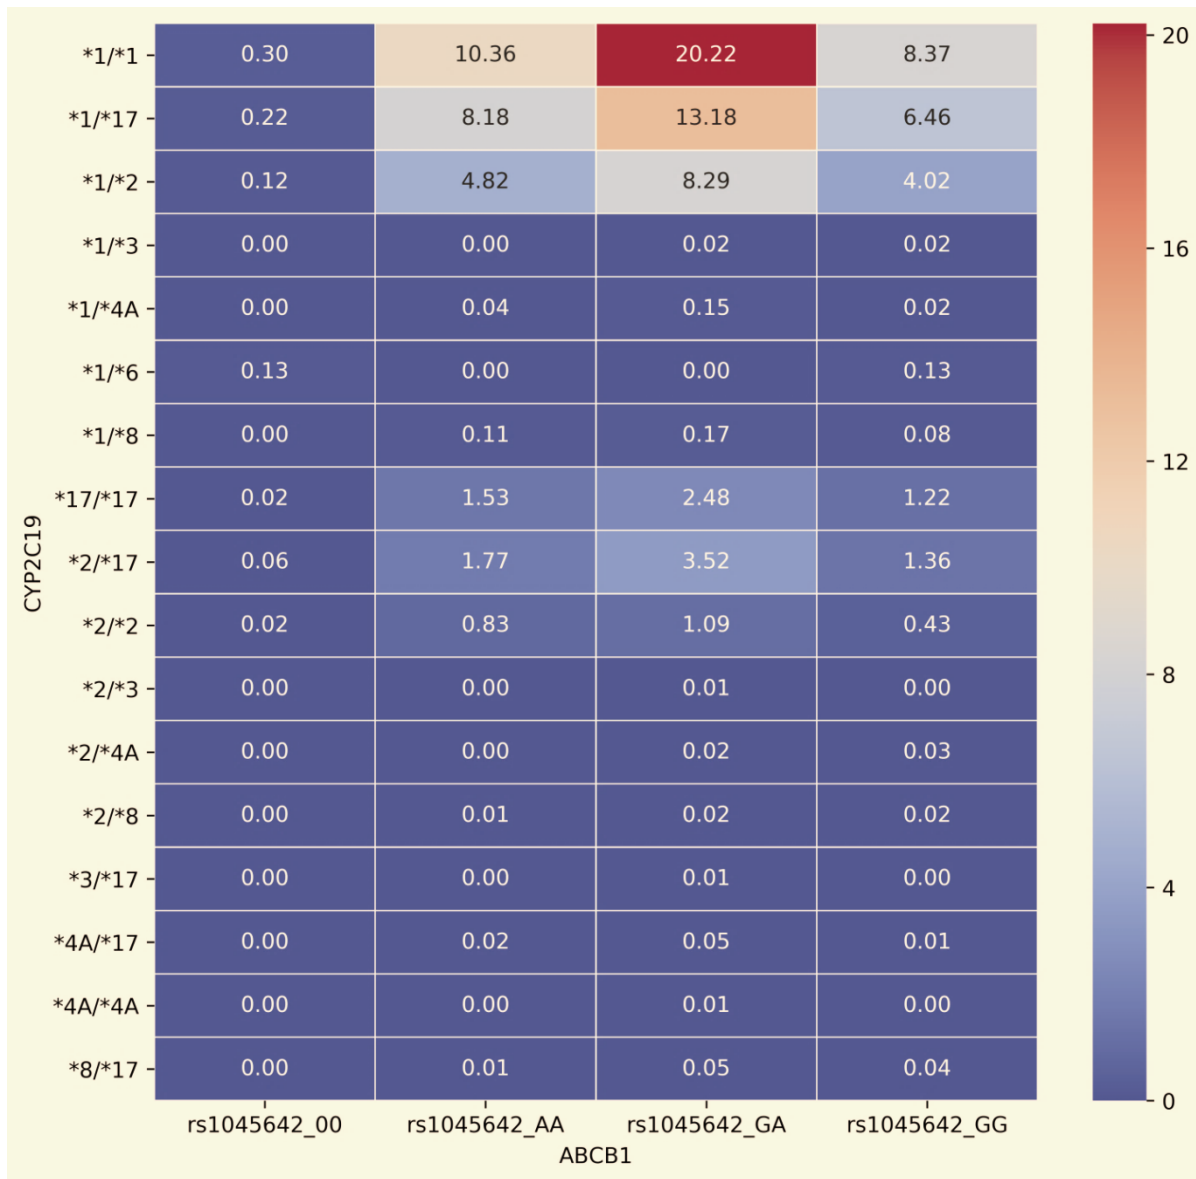

**Figure 9** Frequencies (%) of Diplotype-Diplotype combinations between *ABCB1* and *CYP2C19*

## Cholesterol lowering drug collective

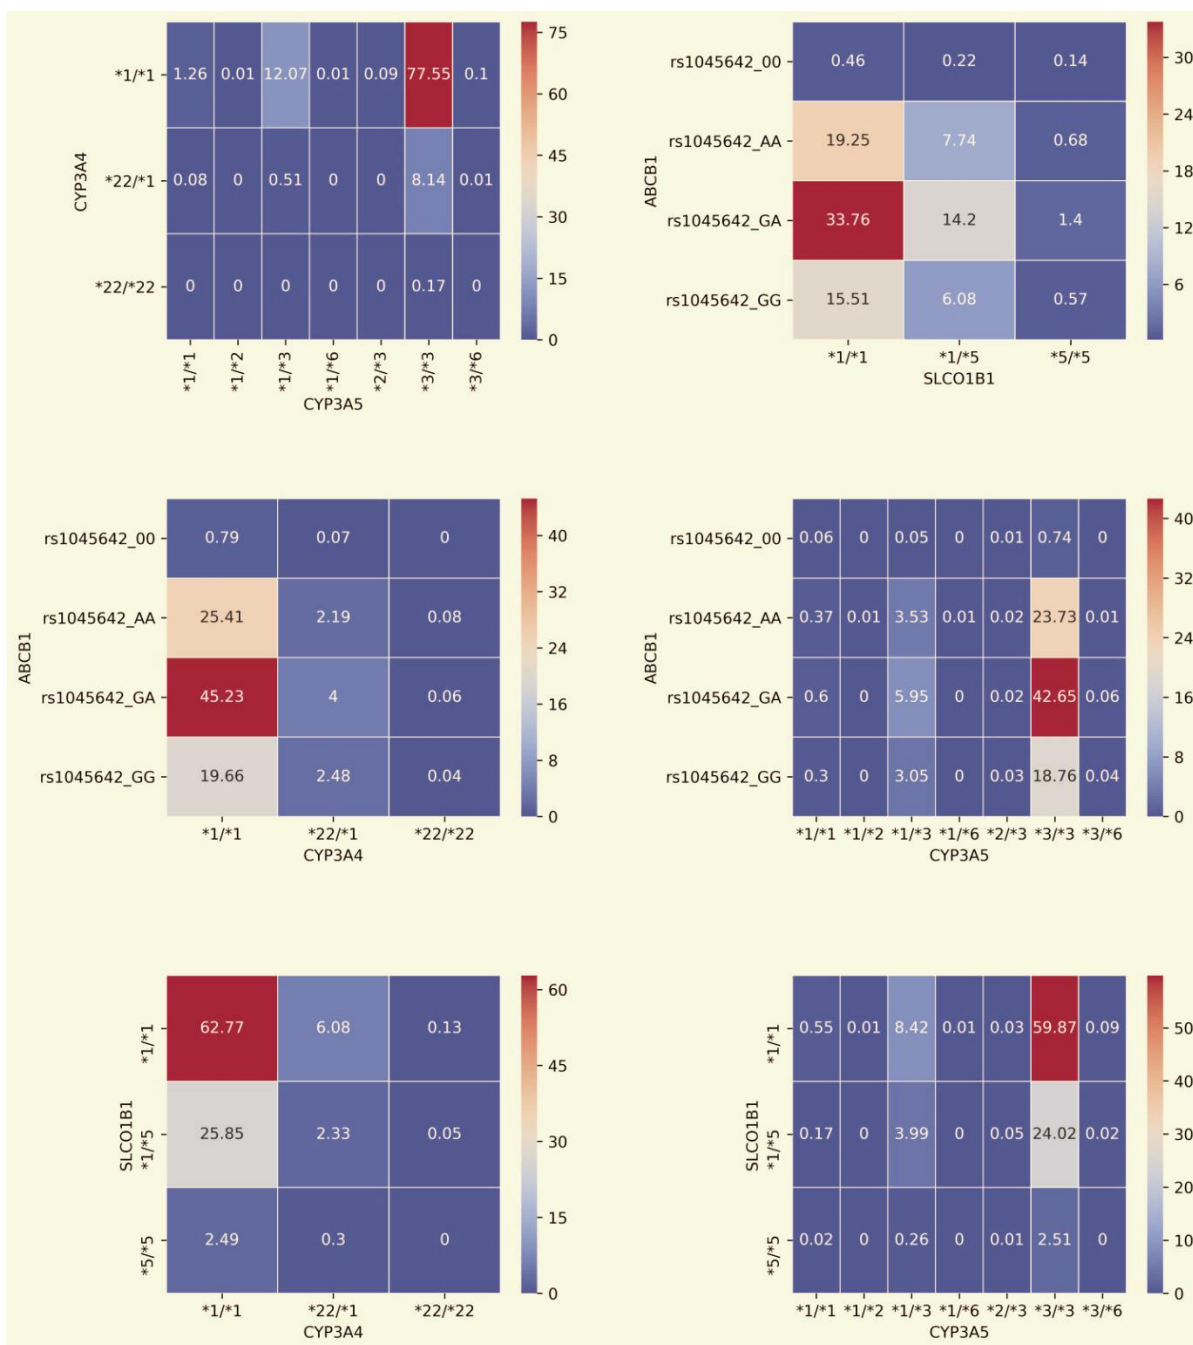

**Figure 10** Frequencies (%) of Diplotype-Diplotype combinations between *ABCB1*, *CYP3A4*, *CYP3A5* and *SLCO1B1*. Highest frequencies could be observed in combination with the *CYP3A5* \*3/\*3 (poor function) diplotype. In the EMPAR study *CYP3A5* \*3/\*3 with *CYP3A4* \*1/\*1 (normal function) were the most frequent observed combination. Similar results were obtained for *SLCO1B1* \*1/\*1 to any other gene combination analyzed, whereas a combination with the *ABCB1* transporter rs1045642\_GA (MW) diplotype appeared as most prevalent result.

**Note:**

Data from de Keyser et al. (2013)<sup>1</sup>, Ufer et al. (2009)<sup>2</sup> and Belmonte et al. (2017)<sup>3</sup> were analogous to EMPAR data translated into phenotypes.

1. de Keyser CE, Peters BJM, Becker ML, et al. The SLCO1B1 c.521T>C polymorphism is associated with dose decrease or switching during statin therapy in the Rotterdam Study. *Pharmacogenet Genomics*. 2014;24(1):43-51. doi:10.1097/FPC.000000000000018
2. Ufer M, Mosyagin I, Muhle H, et al. Non-response to antiepileptic pharmacotherapy is associated with the ABCC2-24C>T polymorphism in young and adult patients with epilepsy. *Pharmacogenet Genomics*. 2009;19(5):353-362. doi:10.1097/FPC.0b013e328329940b
3. Belmonte C, Ochoa D, Román M, et al. Influence of CYP2D6, CYP3A4, CYP3A5 and ABCB1 Polymorphisms on Pharmacokinetics and Safety of Aripiprazole in Healthy Volunteers. *Basic Clin Pharmacol Toxicol*. 2018;122(6):596-605. doi:10.1111/bcpt.12960
